# Supplementary material for: Preformulation and Long-Term Stability Studies of an Optimized Palatable Praziquantel Ethanol-Free Solution for Pediatric Delivery
Source: MDPI journal article supplement (doi:10.3390/pharmaceutics15082050), 2023-07-30

### Supplementary information: HPLC runs

Table S1: Chromatographic information (retention time and peak area and height) for samples stored at 4 °C for 24 hours.

| DAD: Signal B,<br>210 nm/Bw:16 nm |          | Results  |        |         |
|-----------------------------------|----------|----------|--------|---------|
| Retention Time                    |          | Area     | Area % | Height  |
| 0.047                             | 933      |          | 0.00   | 165     |
| 0.195                             | 702      |          | 0.00   | 118     |
| 0.313                             | 655      |          | 0.00   | 131     |
| 0.693                             | 8149     |          | 0.01   | 442     |
| 0.976                             | 8774     |          | 0.01   | 1386    |
| 1.243                             | 495637   |          | 0.69   | 79352   |
| 1.431                             | 31167    |          | 0.04   | 5319    |
| 1.625                             | 85147    |          | 0.12   | 20440   |
| 1.738                             | 45927798 |          | 63.71  | 5540357 |
| 2.332                             | 342889   |          | 0.48   | 36849   |
| 2.669                             | 81470    |          | 0.11   | 9080    |
| 2.843                             | 139208   |          | 0.19   | 9218    |
| 3.438                             | 24899843 |          | 34.54  | 2906410 |
| 4.013                             | 17261    |          | 0.02   | 1460    |
| 4.337                             | 25427    |          | 0.04   | 1174    |
| 4.858                             | 8888     |          | 0.01   | 499     |
| 6.015                             | 12544    |          | 0.02   | 808     |
| Totals                            |          | 72086492 | 100.00 | 8613208 |
|                                   |          |          |        | 100.00  |

Figure S1: Chromatogram for samples stored at 4 °C for 24 hours. The peak at 1.738 min from cosolvent mixture and the one at 3.438 min of PZQ

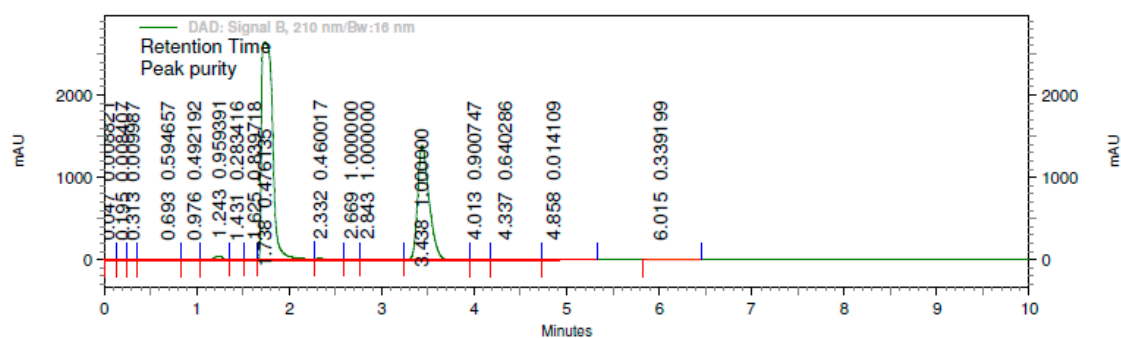

Table S2: Chromatographic information (retention time and peak area and height) for samples stored at 4 °C for 12 months

| DAD: Signal B,<br>210 nm/Bw: 16 nm<br>Results |          |        |          |          |
|-----------------------------------------------|----------|--------|----------|----------|
| Retention Time                                | Area     | Area % | Height   | Height % |
| 0.040                                         | 1034     | 0.00   | 135      | 0.00     |
| 0.268                                         | 335      | 0.00   | 62       | 0.00     |
| 0.412                                         | 131      | 0.00   | 42       | 0.00     |
| 0.650                                         | 885      | 0.00   | 89       | 0.00     |
| 1.492                                         | 8764935  | 9.43   | 1227871  | 10.18    |
| 1.544                                         | 1155782  | 1.24   | 325553   | 2.70     |
| 1.627                                         | 1545467  | 1.66   | 420837   | 3.49     |
| 1.739                                         | 46757509 | 50.33  | 5565340  | 46.16    |
| 2.010                                         | 1128684  | 1.21   | 144283   | 1.20     |
| 2.337                                         | 7089441  | 7.63   | 1309852  | 10.86    |
| 2.651                                         | 189484   | 0.20   | 20089    | 0.17     |
| 2.843                                         | 86265    | 0.09   | 9731     | 0.08     |
| 3.073                                         | 77880    | 0.08   | 6043     | 0.05     |
| 3.444                                         | 26032556 | 28.02  | 3021914  | 25.06    |
| 4.033                                         | 17396    | 0.02   | 1329     | 0.01     |
| 4.334                                         | 22561    | 0.02   | 1124     | 0.01     |
| 4.870                                         | 5095     | 0.01   | 386      | 0.00     |
| 5.068                                         | 735      | 0.00   | 211      | 0.00     |
| 5.178                                         | 2296     | 0.00   | 206      | 0.00     |
| 5.500                                         | 1407     | 0.00   | 65       | 0.00     |
| 5.779                                         | 359      | 0.00   | 111      | 0.00     |
| 6.027                                         | 11785    | 0.01   | 606      | 0.01     |
| 7.177                                         | 80       | 0.00   | 32       | 0.00     |
| 7.398                                         | 5324     | 0.01   | 262      | 0.00     |
| 8.091                                         | 603      | 0.00   | 54       | 0.00     |
| 8.291                                         | 144      | 0.00   | 51       | 0.00     |
| 8.360                                         | 172      | 0.00   | 46       | 0.00     |
| 9.176                                         | 399      | 0.00   | 62       | 0.00     |
| 9.252                                         | 378      | 0.00   | 57       | 0.00     |
| Totals                                        | 92899122 | 100.00 | 12056443 | 100.00   |

Figure S2: Chromatogram for samples stored at 4 °C for 12 months. The peak at 1.739 min from cosolvent mixture, 2.337 min from impurity A, and at 3.444 min of PZQ

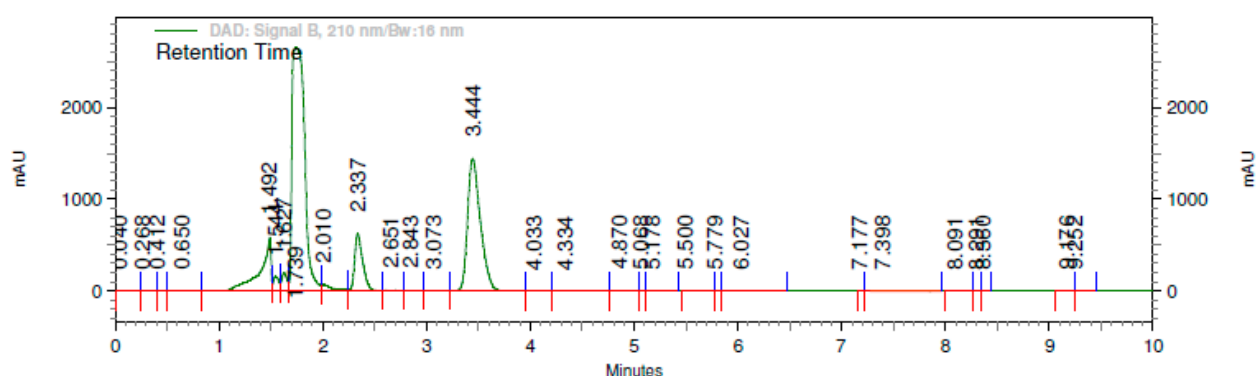

Table S3: Chromatographic information (retention time and peak area and height) for samples stored at 25 °C and under darkness conditions for 24 hours

| DAD: Signal B,<br>210 nm/Bw:16 nm<br>Results |          | Area     | Area % | Height  | Height % |
|----------------------------------------------|----------|----------|--------|---------|----------|
| Retention Time                               |          |          |        |         |          |
| 0.048                                        | 1332     |          | 0.00   | 200     | 0.00     |
| 0.154                                        | 915      |          | 0.00   | 166     | 0.00     |
| 0.302                                        | 2596     |          | 0.00   | 246     | 0.00     |
| 0.968                                        | 16886    |          | 0.02   | 1330    | 0.02     |
| 1.238                                        | 522032   |          | 0.71   | 86272   | 0.99     |
| 1.433                                        | 40948    |          | 0.06   | 6392    | 0.07     |
| 1.625                                        | 95478    |          | 0.13   | 22371   | 0.26     |
| 1.738                                        | 46357447 |          | 62.98  | 5546949 | 63.50    |
| 2.334                                        | 367609   |          | 0.50   | 38640   | 0.44     |
| 2.672                                        | 81771    |          | 0.11   | 9756    | 0.11     |
| 2.849                                        | 168216   |          | 0.23   | 11697   | 0.13     |
| 3.443                                        | 25809734 |          | 35.07  | 3004913 | 34.40    |
| 4.023                                        | 25586    |          | 0.03   | 1961    | 0.02     |
| 4.311                                        | 41699    |          | 0.06   | 1731    | 0.02     |
| 4.866                                        | 30223    |          | 0.04   | 1046    | 0.01     |
| 5.423                                        | 8552     |          | 0.01   | 519     | 0.01     |
| 6.013                                        | 29812    |          | 0.04   | 1038    | 0.01     |
| 6.751                                        | 276      |          | 0.00   | 128     | 0.00     |
| 6.815                                        | 1512     |          | 0.00   | 154     | 0.00     |
| 7.388                                        | 232      |          | 0.00   | 55      | 0.00     |
| 9.028                                        | 546      |          | 0.00   | 52      | 0.00     |
| 9.267                                        | 272      |          | 0.00   | 38      | 0.00     |
| Totals                                       |          | 73603674 | 100.00 | 8735654 | 100.00   |

Figure S3: Chromatogram for samples stored at 25 °C and under darkness conditions for 24 hours. The peak at 1.738 min from cosolvent mixture and the one at 3.443 min of PZQ

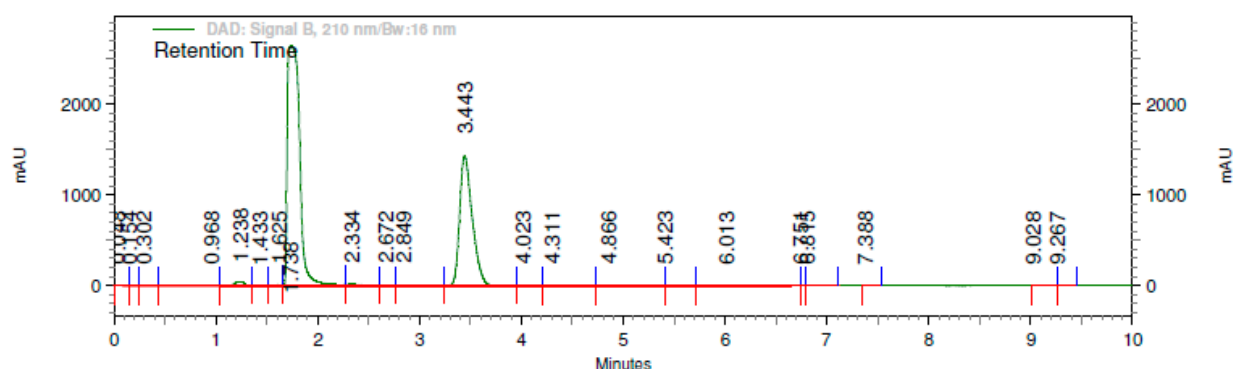

Table S4: Chromatographic information (retention time and peak area and height) for samples stored at 25 °C and under darkness conditions for 12 months

| DAD: Signal B,<br>210 nm/Bw:16 nm |          | Results |         |          |
|-----------------------------------|----------|---------|---------|----------|
| Retention Time                    | Area     | Area %  | Height  | Height % |
| 0.038                             | 769      | 0.00    | 143     | 0.00     |
| 0.198                             | 571      | 0.00    | 131     | 0.00     |
| 0.283                             | 1410     | 0.00    | 172     | 0.00     |
| 0.735                             | 13086    | 0.02    | 716     | 0.01     |
| 1.313                             | 2680313  | 3.32    | 229179  | 2.38     |
| 1.546                             | 1288868  | 1.60    | 333052  | 3.46     |
| 1.628                             | 891158   | 1.10    | 248615  | 2.58     |
| 1.740                             | 48216445 | 59.69   | 5570319 | 57.91    |
| 2.338                             | 978404   | 1.21    | 153598  | 1.60     |
| 2.659                             | 137974   | 0.17    | 13200   | 0.14     |
| 2.835                             | 66662    | 0.08    | 7512    | 0.08     |
| 2.996                             | 66910    | 0.08    | 5006    | 0.05     |
| 3.447                             | 26329661 | 32.60   | 3051652 | 31.73    |
| 4.049                             | 18108    | 0.02    | 1451    | 0.02     |
| 4.343                             | 32271    | 0.04    | 1234    | 0.01     |
| 4.868                             | 13590    | 0.02    | 718     | 0.01     |
| 5.405                             | 193      | 0.00    | 54      | 0.00     |
| 6.032                             | 24220    | 0.03    | 1240    | 0.01     |
| 6.796                             | 9780     | 0.01    | 303     | 0.00     |
| 7.427                             | 2486     | 0.00    | 167     | 0.00     |
| 7.761                             | 454      | 0.00    | 42      | 0.00     |
| 8.011                             | 85       | 0.00    | 54      | 0.00     |
| 8.044                             | 124      | 0.00    | 26      | 0.00     |
| Totals                            |          |         |         |          |
|                                   | 80773542 | 100.00  | 9618584 | 100.00   |

Figure S4: Chromatogram for samples stored at 25 °C and under darkness conditions for 12 months. The peak at 1.740 min from the cosolvent mixture and the one at 3.447 min from PZQ. A low signal from impurity A can be seen at 2.338.

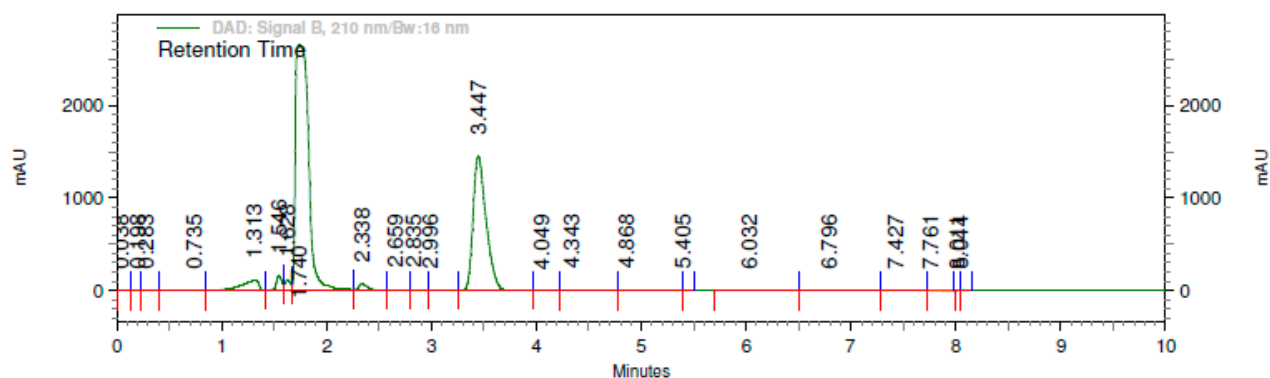

Table S5: Chromatographic information (retention time and peak area and height) for samples stored at 25 °C under light exposure for 24 hours

| DAD: Signal B,<br>210 nm/Bw:16 nm<br>Results |          |          |        |         |
|----------------------------------------------|----------|----------|--------|---------|
| Retention Time                               |          | Area     | Area % | Height  |
| 0.044                                        | 1250     |          | 0.00   | 166     |
| 1.162                                        | 476746   |          | 0.65   | 58040   |
| 1.423                                        | 21014    |          | 0.03   | 5729    |
| 1.473                                        | 14172    |          | 0.02   | 4041    |
| 1.629                                        | 117235   |          | 0.16   | 30916   |
| 1.737                                        | 46221789 |          | 63.09  | 5551997 |
| 2.333                                        | 357689   |          | 0.49   | 38195   |
| 2.673                                        | 77199    |          | 0.11   | 9161    |
| 2.847                                        | 169618   |          | 0.23   | 12748   |
| 3.441                                        | 25720339 |          | 35.10  | 2969976 |
| 4.037                                        | 21927    |          | 0.03   | 1604    |
| 4.356                                        | 40007    |          | 0.05   | 1511    |
| 4.877                                        | 18128    |          | 0.02   | 945     |
| 6.004                                        | 10050    |          | 0.01   | 563     |
| Totals                                       |          | 73267163 | 100.00 | 8685592 |
|                                              |          |          |        | 100.00  |

Figure S5: Chromatogram for samples stored at 25 °C under light exposure for 24 hours for. The peak at 1.737 min from the cosolvent mixture and the one at 3.441 min from PZQ.

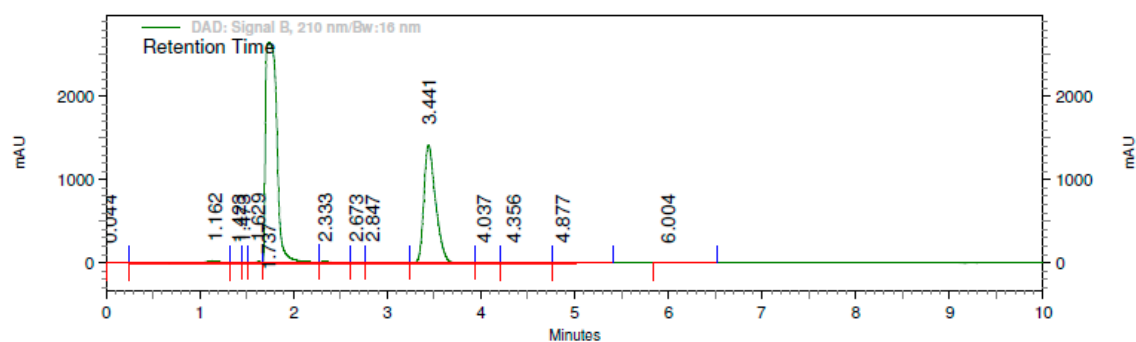

Table S6: Chromatographic information (retention time and peak area and height) for samples stored at 25 °C under light exposure for 12 months

| DAD: Signal B,<br>210 nm/Bw:16 nm |          | Results  |        |          |          |
|-----------------------------------|----------|----------|--------|----------|----------|
| Retention Time                    |          | Area     | Area % | Height   | Height % |
| 0.023                             | 926      |          | 0.00   | 111      | 0.00     |
| 0.287                             | 985      |          | 0.00   | 86       | 0.00     |
| 0.790                             | 113      |          | 0.00   | 54       | 0.00     |
| 1.117                             | 115719   |          | 0.14   | 17776    | 0.16     |
| 1.285                             | 17433    |          | 0.02   | 3446     | 0.03     |
| 1.542                             | 1378172  |          | 1.61   | 344550   | 3.19     |
| 1.626                             | 1823919  |          | 2.14   | 493579   | 4.57     |
| 1.739                             | 47150404 |          | 55.22  | 5548180  | 51.33    |
| 2.140                             | 933650   |          | 1.09   | 140649   | 1.30     |
| 2.337                             | 5640410  |          | 6.61   | 1026386  | 9.50     |
| 2.651                             | 270644   |          | 0.32   | 32095    | 0.30     |
| 2.849                             | 275131   |          | 0.32   | 24445    | 0.23     |
| 3.443                             | 27412430 |          | 32.10  | 3156869  | 29.21    |
| 4.030                             | 26977    |          | 0.03   | 2308     | 0.02     |
| 4.311                             | 44502    |          | 0.05   | 2590     | 0.02     |
| 4.699                             | 19474    |          | 0.02   | 1674     | 0.02     |
| 4.977                             | 69488    |          | 0.08   | 2773     | 0.03     |
| 5.586                             | 17531    |          | 0.02   | 980      | 0.01     |
| 6.043                             | 116657   |          | 0.14   | 6124     | 0.06     |
| 6.584                             | 5013     |          | 0.01   | 431      | 0.00     |
| 6.871                             | 8470     |          | 0.01   | 476      | 0.00     |
| 7.438                             | 60595    |          | 0.07   | 2791     | 0.03     |
| 9.448                             | 4032     |          | 0.00   | 182      | 0.00     |
| 9.937                             | 102      |          | 0.00   | 37       | 0.00     |
| Totals                            |          | 85392777 | 100.00 | 10808592 | 100.00   |

Figure S6: Chromatogram for samples stored at 25 °C under light exposure for 12 months. Peak at 1.739 min from cosolvent mixture, at 2.337 min from impurity A and the one at 3.443 min from PZQ

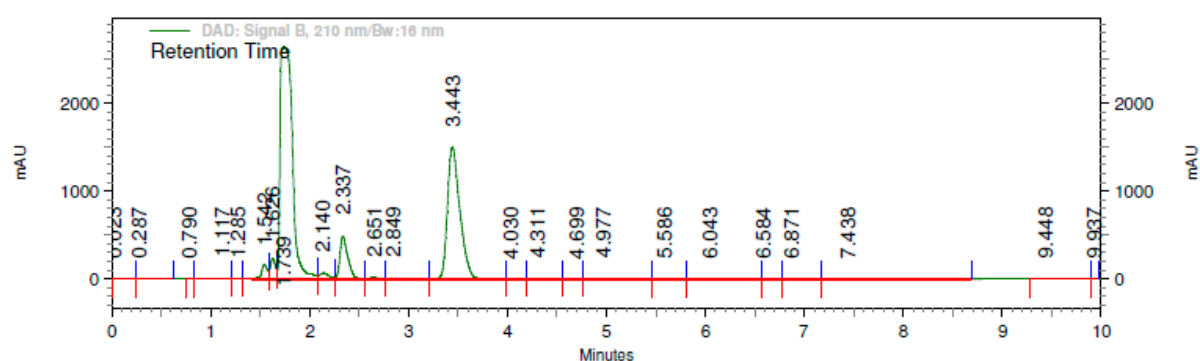

Table S7: Chromatographic information (retention time and peak area and height) for samples stored at 40 °C for 24 hours

| DAD: Signal B,<br>210 nm/Bw:16 nm<br>Results |          |          |        |         |          |
|----------------------------------------------|----------|----------|--------|---------|----------|
| Retention Time                               |          | Area     | Area % | Height  | Height % |
| 0.046                                        | 916      |          | 0.00   | 163     | 0.00     |
| 0.168                                        | 186      |          | 0.00   | 75      | 0.00     |
| 0.268                                        | 243      |          | 0.00   | 91      | 0.00     |
| 0.708                                        | 119      |          | 0.00   | 39      | 0.00     |
| 0.982                                        | 7838     |          | 0.01   | 1334    | 0.01     |
| 1.260                                        | 562258   |          | 0.73   | 85198   | 0.95     |
| 1.470                                        | 41379    |          | 0.05   | 8049    | 0.09     |
| 1.632                                        | 105259   |          | 0.14   | 25091   | 0.28     |
| 1.745                                        | 47562727 |          | 61.99  | 5568578 | 62.15    |
| 2.348                                        | 380482   |          | 0.50   | 40607   | 0.45     |
| 2.686                                        | 89783    |          | 0.12   | 10272   | 0.11     |
| 2.868                                        | 214989   |          | 0.28   | 17871   | 0.20     |
| 3.466                                        | 27658748 |          | 36.05  | 3197178 | 35.68    |
| 4.059                                        | 21862    |          | 0.03   | 1645    | 0.02     |
| 4.362                                        | 35955    |          | 0.05   | 1555    | 0.02     |
| 4.932                                        | 22699    |          | 0.03   | 896     | 0.01     |
| 5.542                                        | 4788     |          | 0.01   | 273     | 0.00     |
| 6.084                                        | 12036    |          | 0.02   | 616     | 0.01     |
| 6.637                                        | 189      |          | 0.00   | 51      | 0.00     |
| 8.520                                        | 3591     |          | 0.00   | 184     | 0.00     |
| Totals                                       |          | 76726047 | 100.00 | 8959766 | 100.00   |

Figure S7: Chromatogram for samples stored at 40 °C for 24 hours. The peak at 1.745 min from cosolvent mixture and the one at 3.446 min from PZQ

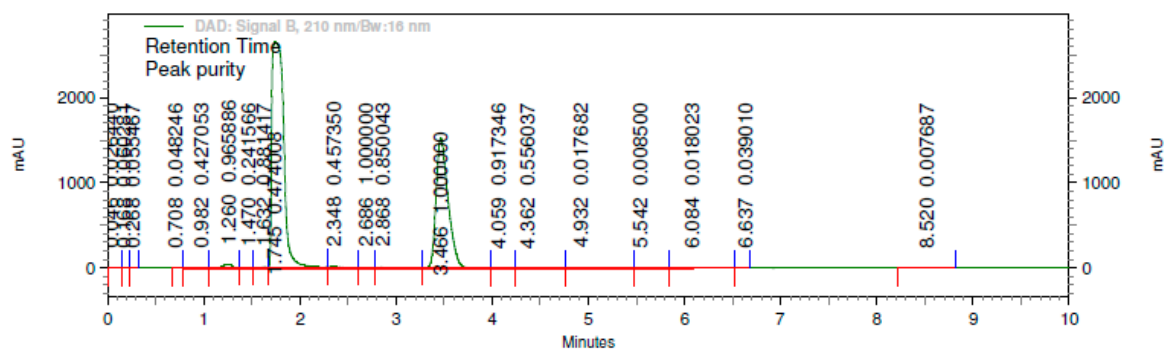

Table S8: Chromatographic information (retention time and peak area and height) for samples stored at 40 °C for 12 months

| DAD: Signal B,<br>210 nm/Bw:16 nm<br>Results |          |          |        |          |          |
|----------------------------------------------|----------|----------|--------|----------|----------|
| Retention Time                               |          | Area     | Area % | Height   | Height % |
| 0.046                                        | 769      |          | 0.00   | 145      | 0.00     |
| 0.174                                        | 200      |          | 0.00   | 64       | 0.00     |
| 0.297                                        | 215      |          | 0.00   | 75       | 0.00     |
| 0.966                                        | 15824    |          | 0.02   | 1710     | 0.02     |
| 1.244                                        | 594748   |          | 0.69   | 92974    | 0.87     |
| 1.373                                        | 17188    |          | 0.02   | 6533     | 0.06     |
| 1.543                                        | 1542074  |          | 1.80   | 361665   | 3.38     |
| 1.625                                        | 678550   |          | 0.79   | 201188   | 1.88     |
| 1.741                                        | 47534368 |          | 55.50  | 5560766  | 51.95    |
| 2.138                                        | 1117888  |          | 1.31   | 177321   | 1.66     |
| 2.334                                        | 5787111  |          | 6.76   | 1061252  | 9.91     |
| 2.653                                        | 166056   |          | 0.19   | 17773    | 0.17     |
| 2.843                                        | 200471   |          | 0.23   | 15184    | 0.14     |
| 3.439                                        | 27787645 |          | 32.44  | 3197366  | 29.87    |
| 4.033                                        | 27520    |          | 0.03   | 2181     | 0.02     |
| 4.322                                        | 36585    |          | 0.04   | 1934     | 0.02     |
| 4.918                                        | 84302    |          | 0.10   | 2365     | 0.02     |
| 5.705                                        | 1703     |          | 0.00   | 431      | 0.00     |
| 6.033                                        | 17544    |          | 0.02   | 1427     | 0.01     |
| 6.134                                        | 19188    |          | 0.02   | 1382     | 0.01     |
| 7.400                                        | 19242    |          | 0.02   | 915      | 0.01     |
| Totals                                       |          | 85649191 | 100.00 | 10704651 | 100.00   |

Figure S8: Chromatogram for samples stored at 40 °C for 12 months. The peak at 1.741min from cosolvent mixture and the one at 3.439 min from PZQ

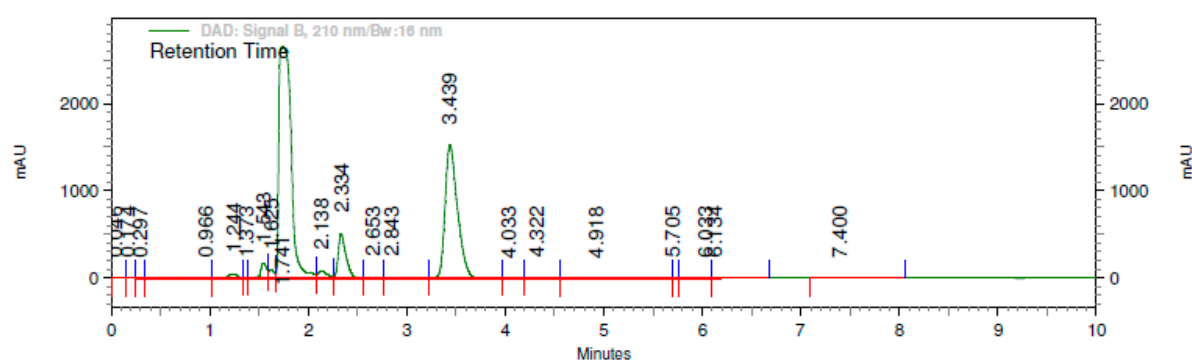

Supplement: s1 [file s1]
